# Supplementary material
Source: PubMed Central journal article supplement (PMC5360537)
Supplement: NIHMS849324-supplement-1.pdf [file NIHMS849324-supplement-1.pdf]

Expression of IL-22 in the Skin Causes Th2-Biased Immunity, Epidermal Barrier Dysfunction  
and Pruritus via Stimulating Epithelial Th2 Cytokines and the GRP Pathway

Hongfei Lou, MD, PhD<sup>1,2</sup>, Jingning Lu, PhD<sup>1</sup>, Eun Byul Choi, MS<sup>1</sup>, Min Hee Oh, MS<sup>1</sup>,  
Mingeum Jeong, MS<sup>1</sup>, Sara Barmettler, MD<sup>1</sup>, Zhou Zhu, MD, PhD<sup>1</sup>, and Tao Zheng, MD<sup>1,§</sup>

<sup>1</sup>Yale University School of Medicine

Section of Allergy and Clinical Immunology

New Haven, CT

<sup>2</sup>Department of Otolaryngology Head and Neck Surgery,

Beijing Tongren Hospital, Capital Medical University,

Beijing 100730, PR China

*Running Title: IL-22 Induces Chronic Atopic Dermatitis in Mice*

§Correspondence: Dr. Tao Zheng, Email: [tao.zheng@yale.edu](mailto:tao.zheng@yale.edu)

(This work was supported by NIH AI07502 grant and the Milstein Medical Asian American Partnership (MMAAP) Foundation grant to TZ and NIH P01HL107151 to ZZ.)

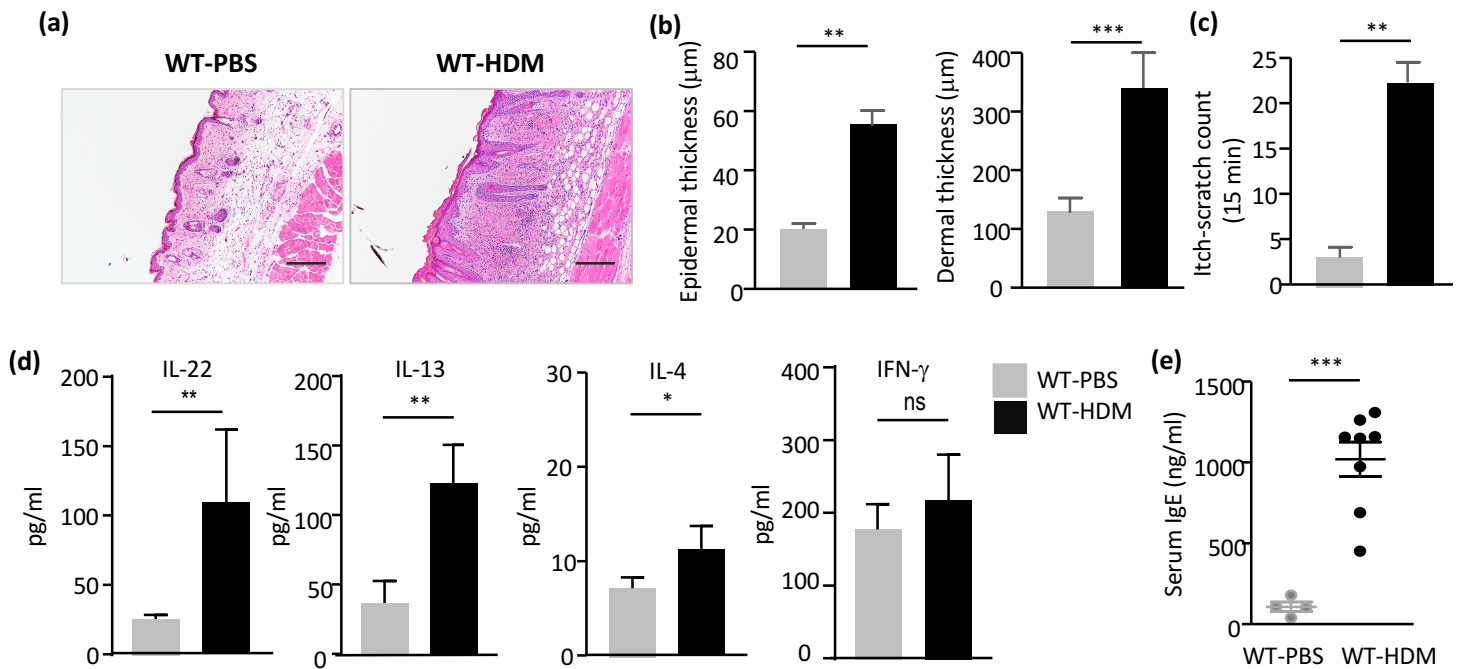

**Supplemental Figure 1. Enhanced expression of Th22 cytokine IL-22 in HDM-sensitized skin of WT mice.** (a) Representative photomicrographs of H&E-stained sections. (Scale bars: 100  $\mu\text{m}$ .) (b) Epidermal and dermal thickness. (c) Itch/scratching scores. (d) Th22, Th2 and Th1 cytokines in the skin measured by ELISA. Similar results were obtained in two other independent experiments. Data are Mean  $\pm$  SEM (n = 5–6 per group). (e) Serum total IgE measured by ELISA. (WT-PBS n=4, WT-HDM n=8). (\* $P$  < 0.05; \*\* $P$  < 0.01; \*\*\* $P$  < 0.001. ns, not significant).

**Supplemental Table 1. Primer sequences for real time PCR**

| Target Gene | Forward                          | Reverse                          |
|-------------|----------------------------------|----------------------------------|
| hIL-33      | 5'-AACCTACCAGAGCCTAGATGAG-3'     | 5'-GCCCAATGTGACAGTGAGTATTA-3'    |
| hIL-13      | 5'-CACGGTCATTGCTCTCACTT-3'       | 5'-CTTCTGGTTCTGGGTGATGTT-3'      |
| hIL-25      | 5'-TGAGTTGGACAGAGACTTGAAC-3'     | 5'-GAAGACAGTCTGGTTGTGGTAG-3'     |
| hGRP        | 5'-AGGAATTTGCTGGGTCTCATAG-3'     | 5'-AGTTGCTGCTATCCTCTGAATC-3'     |
| hGRPR       | 5'-CTCTGTTGGGGTGTCTGTCTT-3'      | 5'-TCTGGTTGGTGCTTTCCTCAT-3'      |
| hTSLP       | 5'-GGCCACATTGCCTTACTGAAA-3'      | 5'-TCTCCTCTTCTTCATTGCCTGA-3'     |
| hFLG1       | 5'-CAGGACACAAGCACAGAAAGC-3'      | 5'-CTGTTTCTCTGGGCTCTTGGA-3'      |
| hFLG2       | 5'-GGGGTCTCACACACACATTCA-3'      | 5'-ATGCCCTTCTCCAGTTGTCC-3'       |
| hTGase 3    | 5'-ATCATCTACAACGGCAGCCTT-3'      | 5'-ACCACCACCTCAGACTCATCT-3'      |
| hGAPDH      | 5'-GGAAGGTGAAGGTCGGAGTC-3'       | 5'-GAAGGGGTCATTGATGGCAAC-3'      |
| mFLG1       | 5'-GAAGGAACTTCTGGAAGGACAAC-3'    | 5'-TCCATCAGTCCACCATGCCTC-3'      |
| mFLG2       | 5'-GAGCAAGGATGAGCTAAAGGAAC-3'    | 5'-GCCACGCCTATGCTTCTTTGAC-3'     |
| mClaudin-1  | 5'-ATCGCAATCTTTGTGTCCACCATTG-3'  | 5'-ATTCTGTTCCATACCATGCTGTGG-3'   |
| mTLR-7      | 5'-CCATCAACCACATACCAAGC-3'       | 5'-TCTGCAGCCTCTTGGTACAC-3'       |
| mTLR-9      | 5'-GCATGGTGGTGCCTATACTG-3'       | 5'-AACACCACGAAGGCATCATA-3'       |
| mIL-31      | 5'-GTGCCTGGAAATACTGATGAA-3'      | 5'-CTGCCATGCAGTTTGAGAACT-3'      |
| mGAPDH      | 5'-ACT CCA CTC ACG GCA AAT TC-3' | 5' TCT CCA TGG TGG TGA AGA CA-3' |
